# Supplementary material
Source: PubMed Central journal article supplement (PMC5149406)

Cell Host & Microbe, Volume 20

## Supplemental Information

**IL-17 Receptor Signaling in the Lung Epithelium**

**Is Required for Mucosal Chemokine Gradients**

**and Pulmonary Host Defense against *K. pneumoniae***

**Kong Chen, Taylor Eddens, Giralдина Trevejo-Nunez, Emily E. Way, Waleed Elsegeiny, David M. Ricks, Abhishek V. Garg, Carla J. Erb, Meihua Bo, Ting Wang, Wei Chen, Janet S. Lee, Sarah L. Gaffen, and Jay K. Kolls**

**Supplementary Fig 1, related to Figure 1. Characterization of the IL17R flox mice in vitro.** (A) Ear skin fibroblasts were derived from the *Il17ra<sup>f/f</sup>* mice and infected with adenovirus encoding CRE recombinase for 3 days. Cells treated with AdCRE or control virus were stimulated with TNF- $\alpha$  or the combination of TNF- $\alpha$  (1ng/mL) and IL-17 (10ng/mL) for 24h. Gene expression was determined by real-time RT-PCR. (B) Homozygotes *Il17ra<sup>f/f</sup>* mice were sacrificed 5 days after receiving  $10^8$  Ad-CMV or Ad-CRE through intravenous injection. PCR using primers detecting recombined allele in the spleens were performed. Bands with no Cre-mediated recombination and Post-Cre in the spleens were indicated by arrows. (C) Peripheral blood from the *Il17ra<sup>f/f</sup> E2a-Cre<sup>-</sup>* and *Il17ra<sup>f/f</sup> E2a-Cre<sup>+</sup>* mice were collected from the tails and stained with IL-17RA and Gr-1 antibodies after red blood cell lysis. 3 mice for each genotype were shown.

**Supplementary Fig 2 , related to Figure 1. Specific knock out of IL-17R in the flox mice.** (A) Peripheral blood (PBL) from the *Il17ra<sup>f/f</sup> E2a-Cre<sup>-</sup>* and *Il17ra<sup>f/f</sup> E2a-Cre<sup>+</sup>* mice were collected from the tails and stained with IL-17RA and Gr-1 antibodies after red blood cell lysis. (B) Percentage of Gr-1+ cells in the PBL were graphed. (C) *Il17rc<sup>f/f</sup>* and *Il17rc<sup>f/f</sup> E2a-Cre<sup>+</sup>* mice were challenged with recombinant CXCL1 intranasally (1ug/mouse) for 24h and neutrophils as well as macrophage numbers were determined by FACS.

**Supplementary Fig 3, related to Figure 2. *Scgb1a1-Cre* mediated recombination.**

(A) PCR using primers detecting recombined allele in the lungs from *Il17ra<sup>fl/fl</sup> Scgb1a1-Cre<sup>-</sup>* and *Il17ra<sup>fl/fl</sup> Scgb1a1-Cre<sup>+</sup>* mice were performed. Bands with no Cre-mediated recombination and Post-Cre were indicated by arrows. (B) *Il17ra* expression in the bronchial brushes from *Il17ra<sup>fl/fl</sup> Scgb1a1-Cre<sup>-</sup>* and *Il17ra<sup>fl/fl</sup> Scgb1a1-Cre<sup>+</sup>* mice were determined by real-time RT-PCR.

**Supplementary Fig 4, related to Figure 4. Real-time RT-PCR validation of RNA-seq findings.**

*Il17rc<sup>fl/fl</sup> Scgb1a1-Cre<sup>-</sup>* and *Il17rc<sup>fl/fl</sup> Scgb1a1-Cre<sup>+</sup>* mice were challenged with recombinant IL-17 intranasally (300ng/mouse) for 6h and bronchial brushings were harvested for RNA extraction and real-time RT-PCR analysis.

**Supplementary Fig 5, related to Figure 5. Airway inflammation in CXCL5 rescued**

***Il17ra<sup>fl/fl</sup> x Scgb1a1-Cre<sup>+</sup>* after *K. pneumoniae* infection.** *Il17ra<sup>fl/fl</sup> Scgb1a1-Cre<sup>-</sup>* and *Il17ra<sup>fl/fl</sup> Scgb1a1-Cre<sup>+</sup>* mice were infected with 10<sup>4</sup> KP43816 intranasally. 2h post infection, half of *Il17ra<sup>fl/fl</sup> Scgb1a1-Cre<sup>+</sup>* the mice received 1ug recombinant CXCL5 (LIX). Mice were sacrificed 24h after infections. Airway inflammation was assessed by H&E staining.

**Supplementary Fig 6, related to Figure 6. Role of IL-17RE in IL-17 mediated**

**airway inflammation.** RNAseq analysis was conducted on NHBE cells stimulated with recombinant human IL-17 (100ng/mL) for 48h (N=3-4). Heat map of the expression for IL-17 family cytokines and IL-17 receptor family were shown (A). *Il17c* expression in naïve unchallenged B6, WT or *Il17re<sup>+/-</sup>* as well as littermates *Il17re<sup>-/-</sup>* mice 24h post intranasal IL-17 challenge, and B6 mice 24h post KP infection were determined by real-time RT-PCR (B). BAL cell infiltration from control littermates and *Il17re<sup>-/-</sup>* mice 24h post intranasal IL-17 challenge were measured by FACS (C). Gene expression of IL-17 downstream chemokines and cytokines were determined by real-time RT-PCR (D).

# Supplementary Fig 1

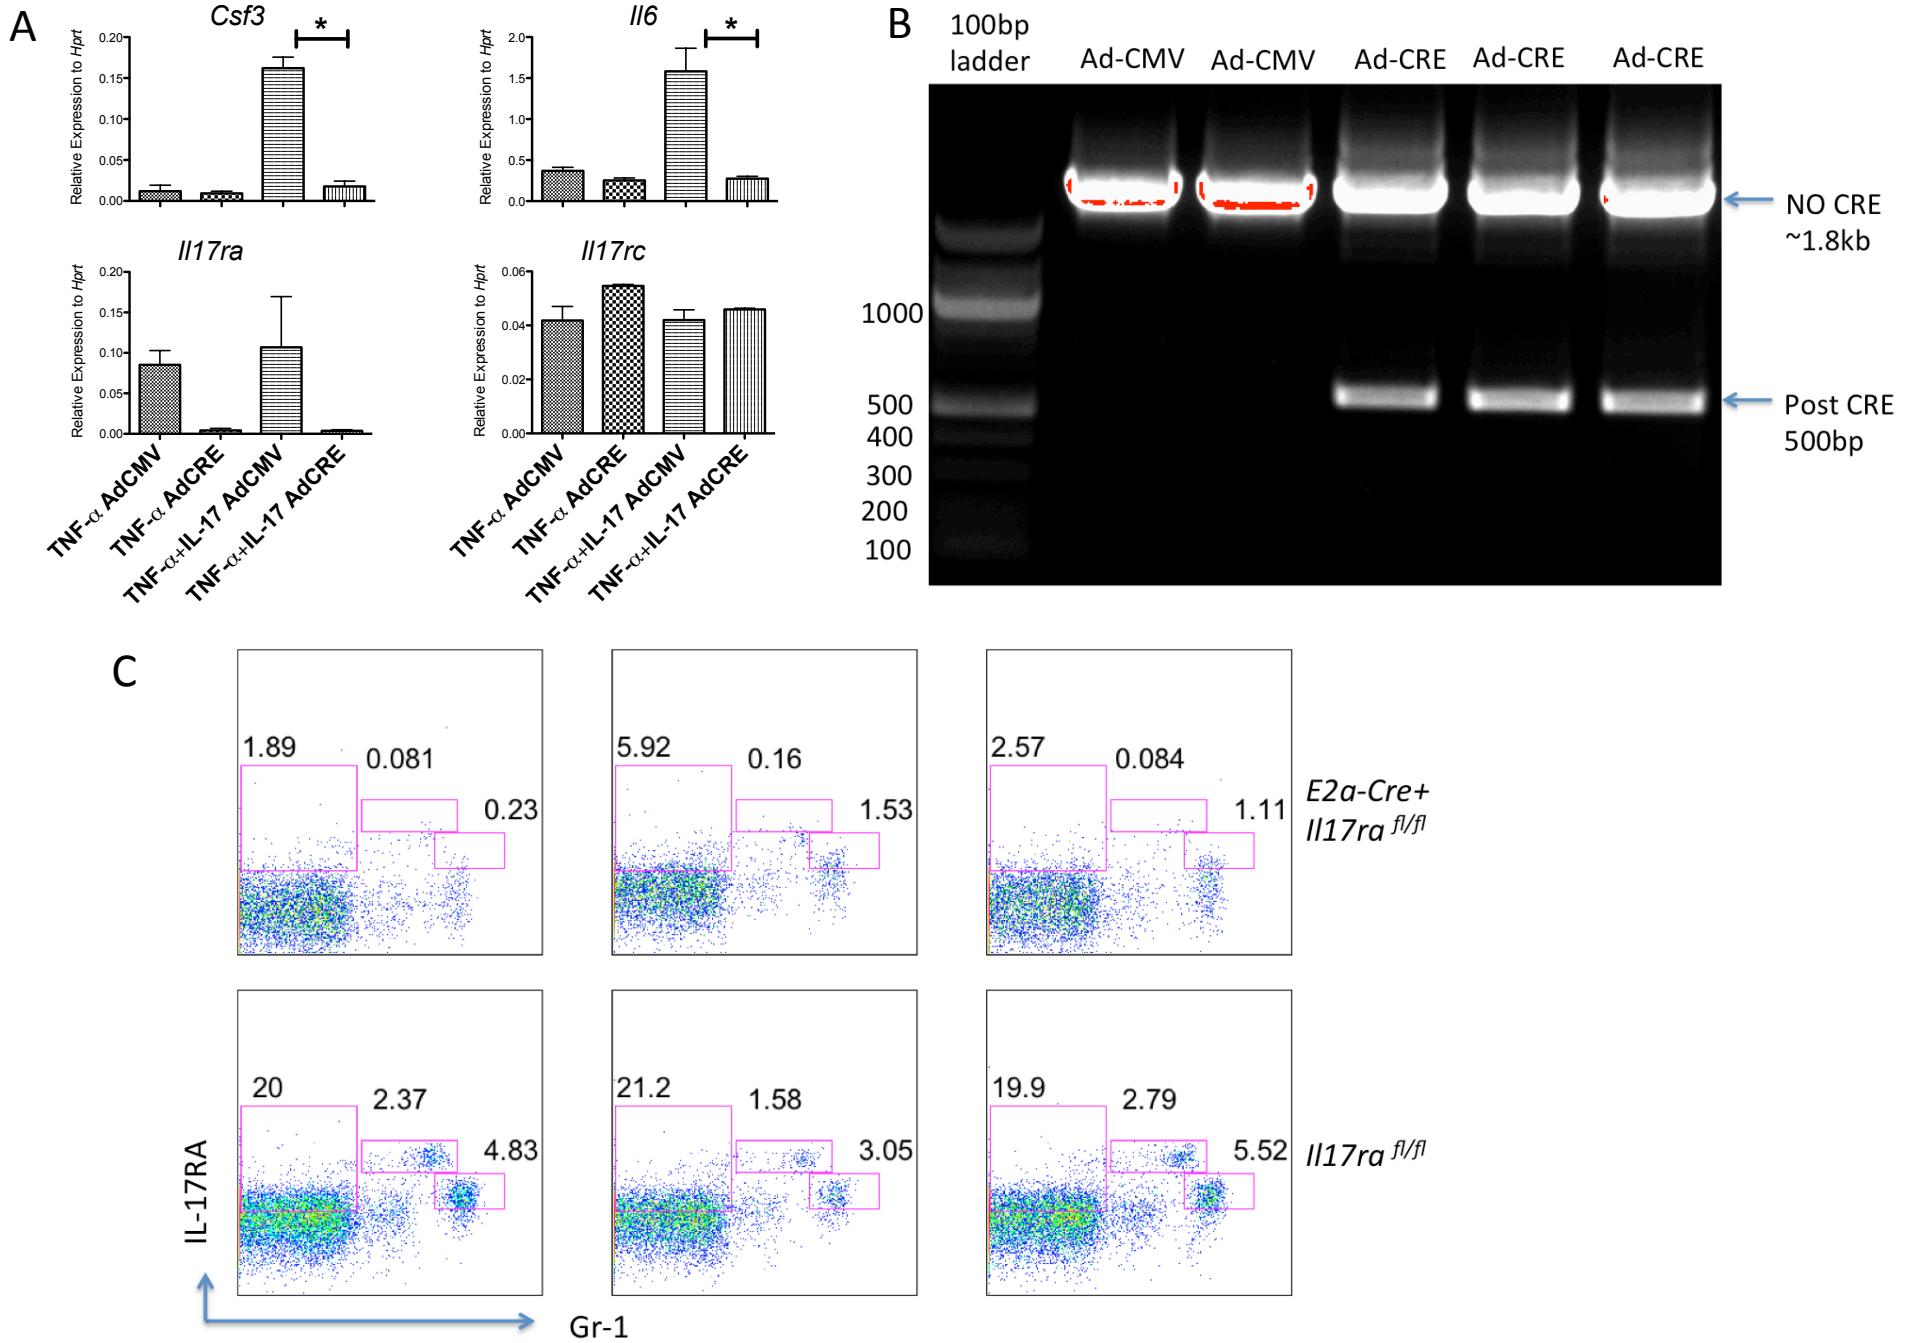



# Supplementary Fig 2

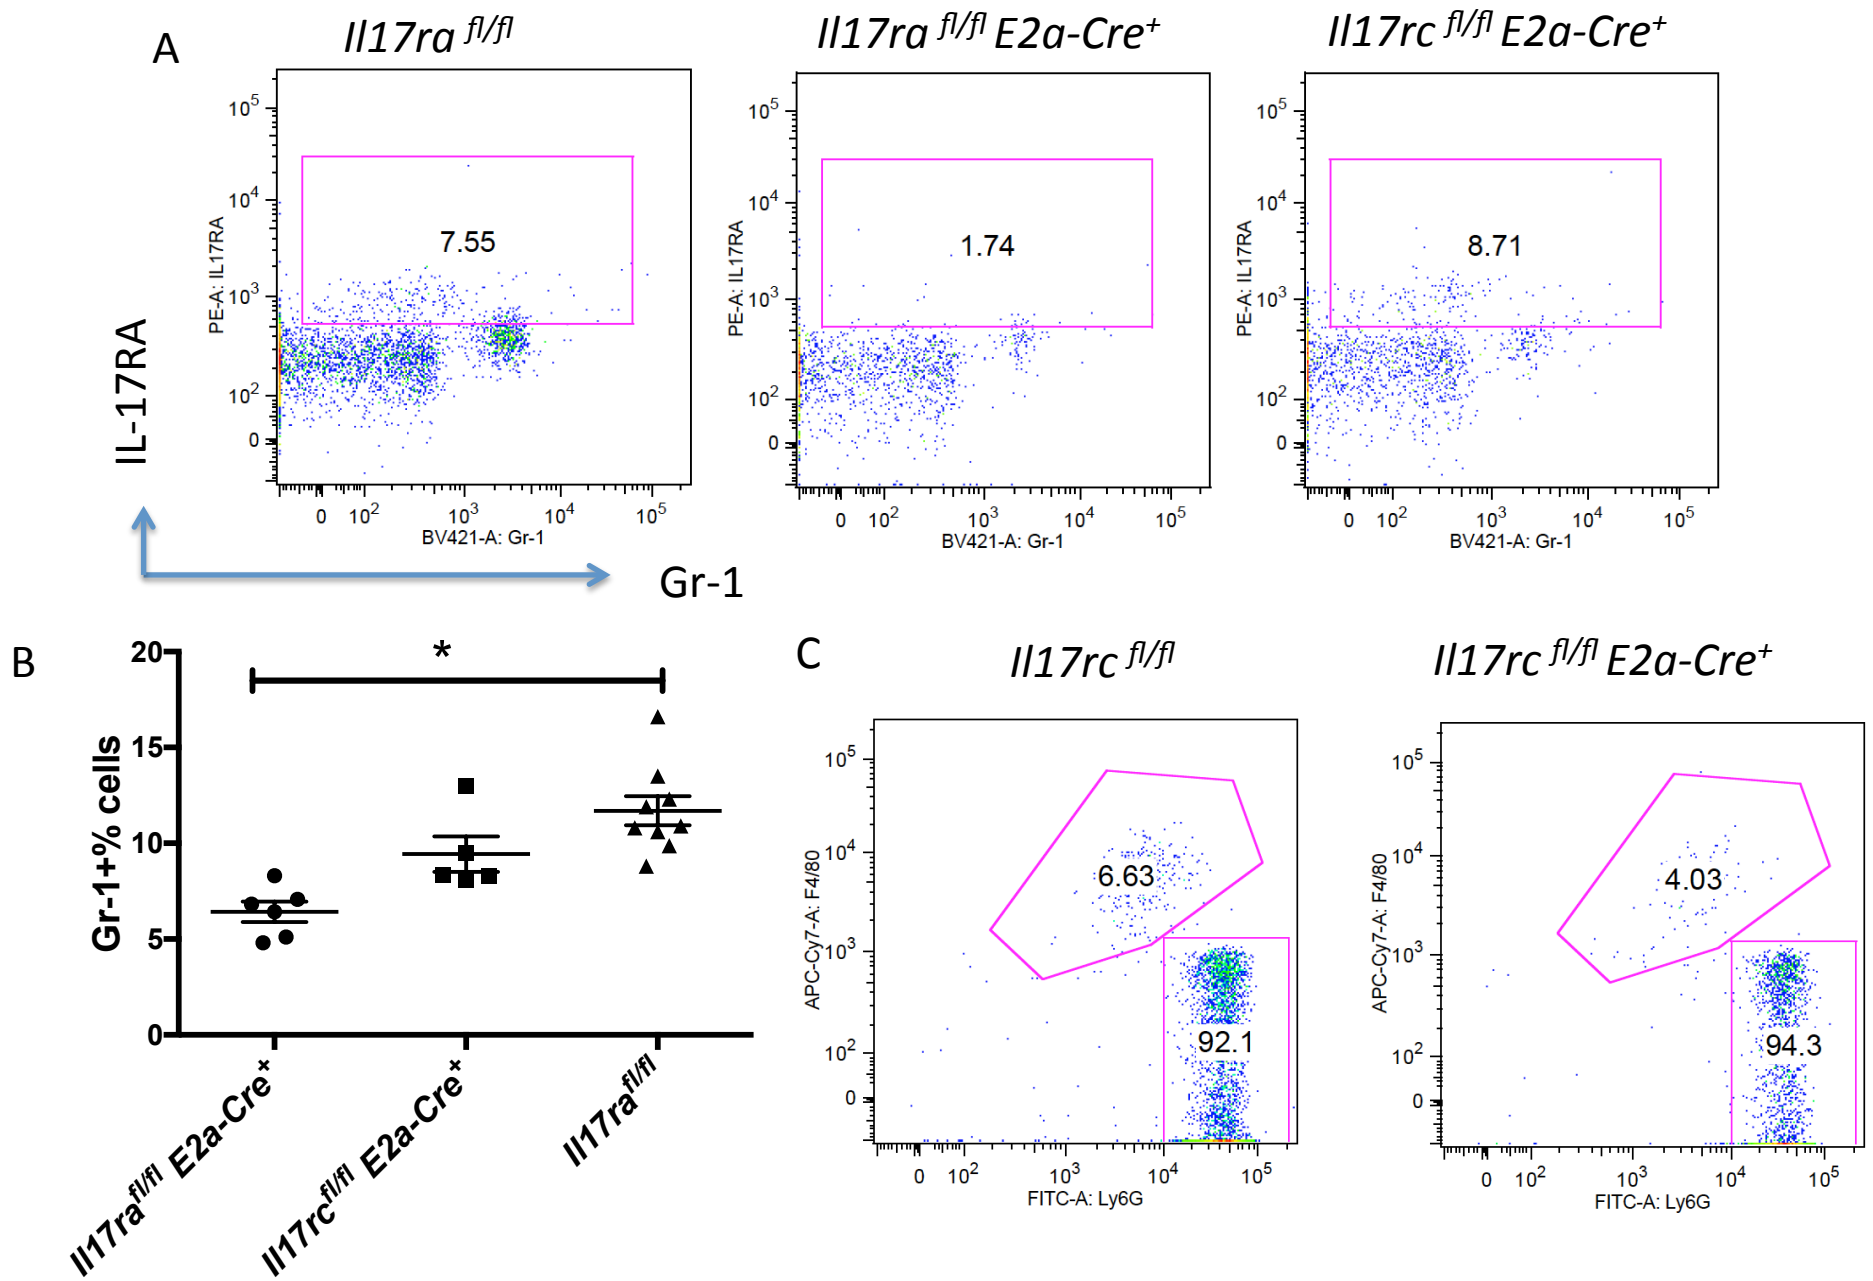

Supplementary Fig 3

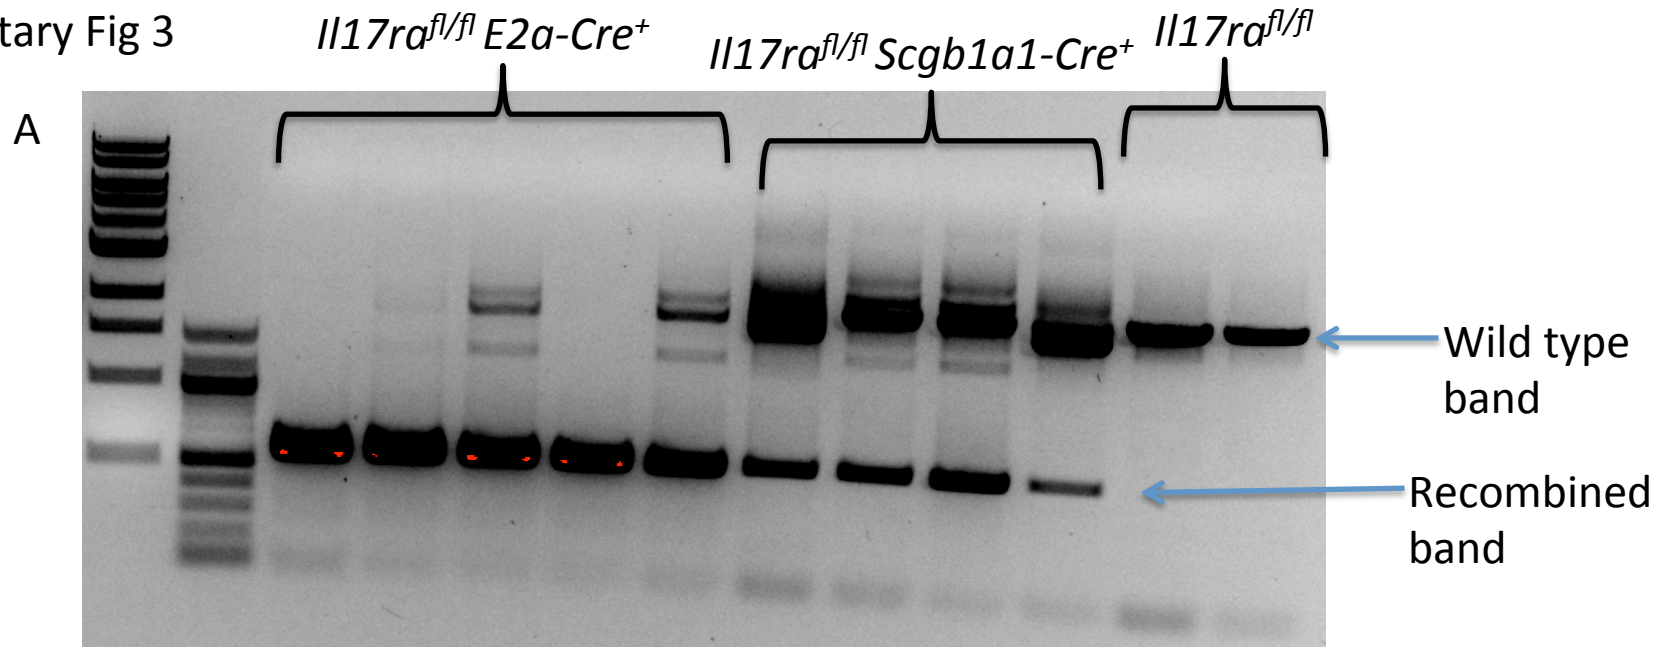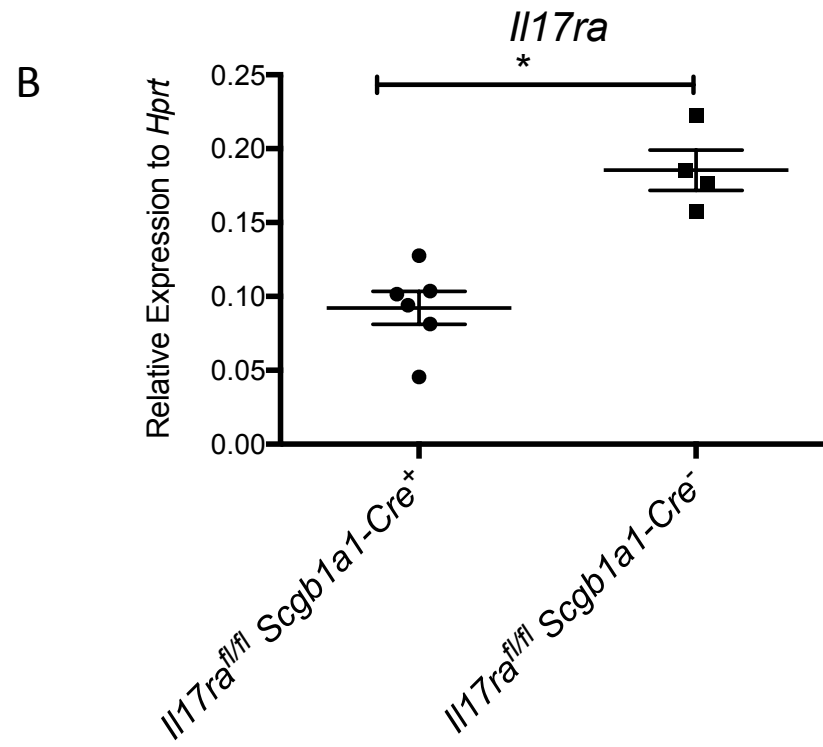

# Supplementary Fig 4

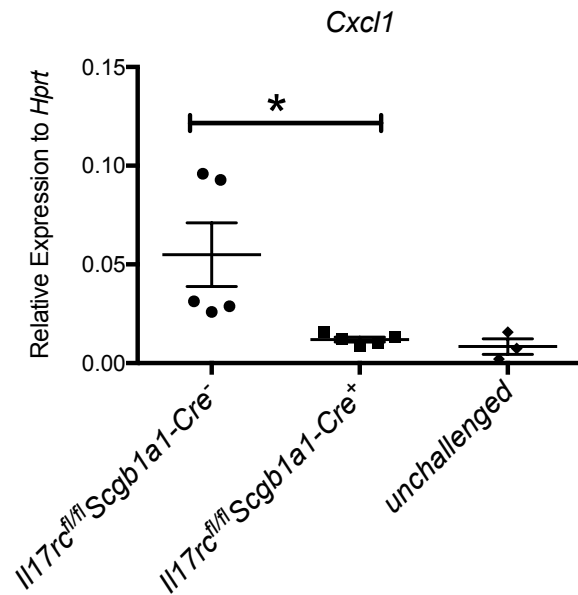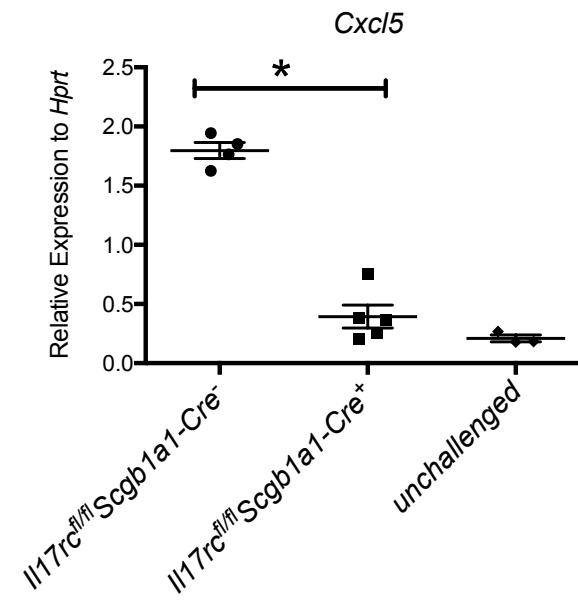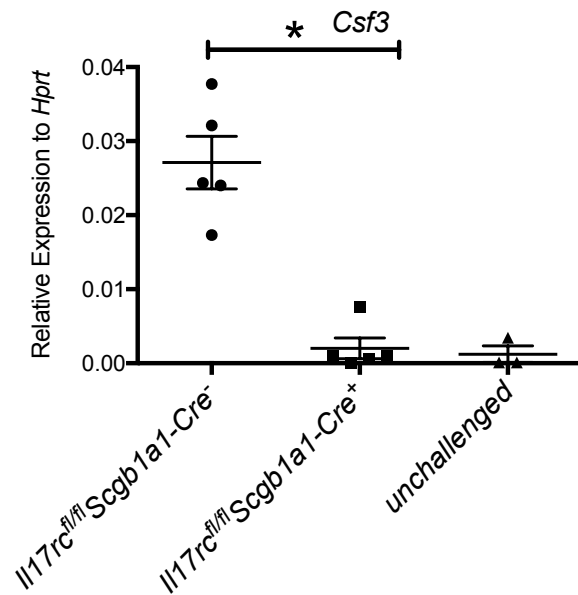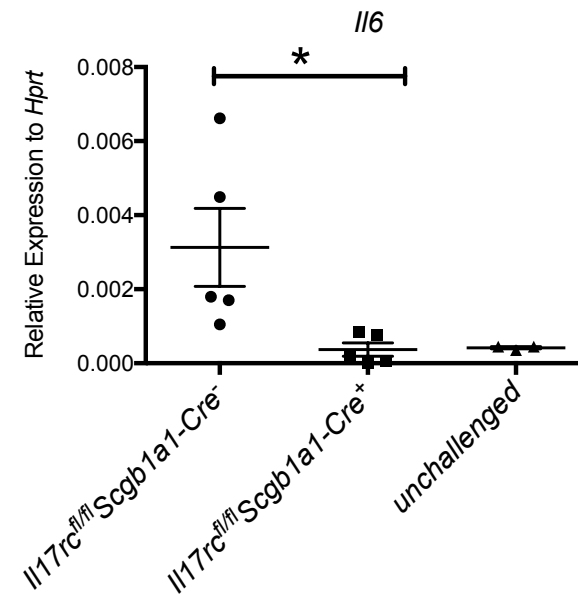

Supplementary Fig 5

*Il17ra<sup>fl/fl</sup> x Scgb1a1-Cre<sup>+</sup> +K. pneumoniae*

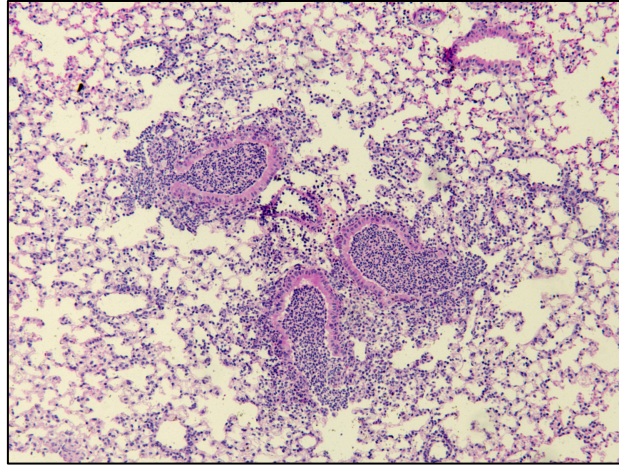

+ PBS

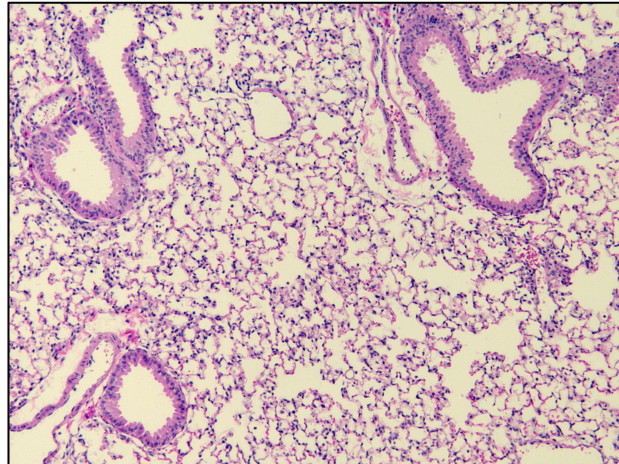

+ CXCL5  
(LIX)

# Supplementary Fig 6

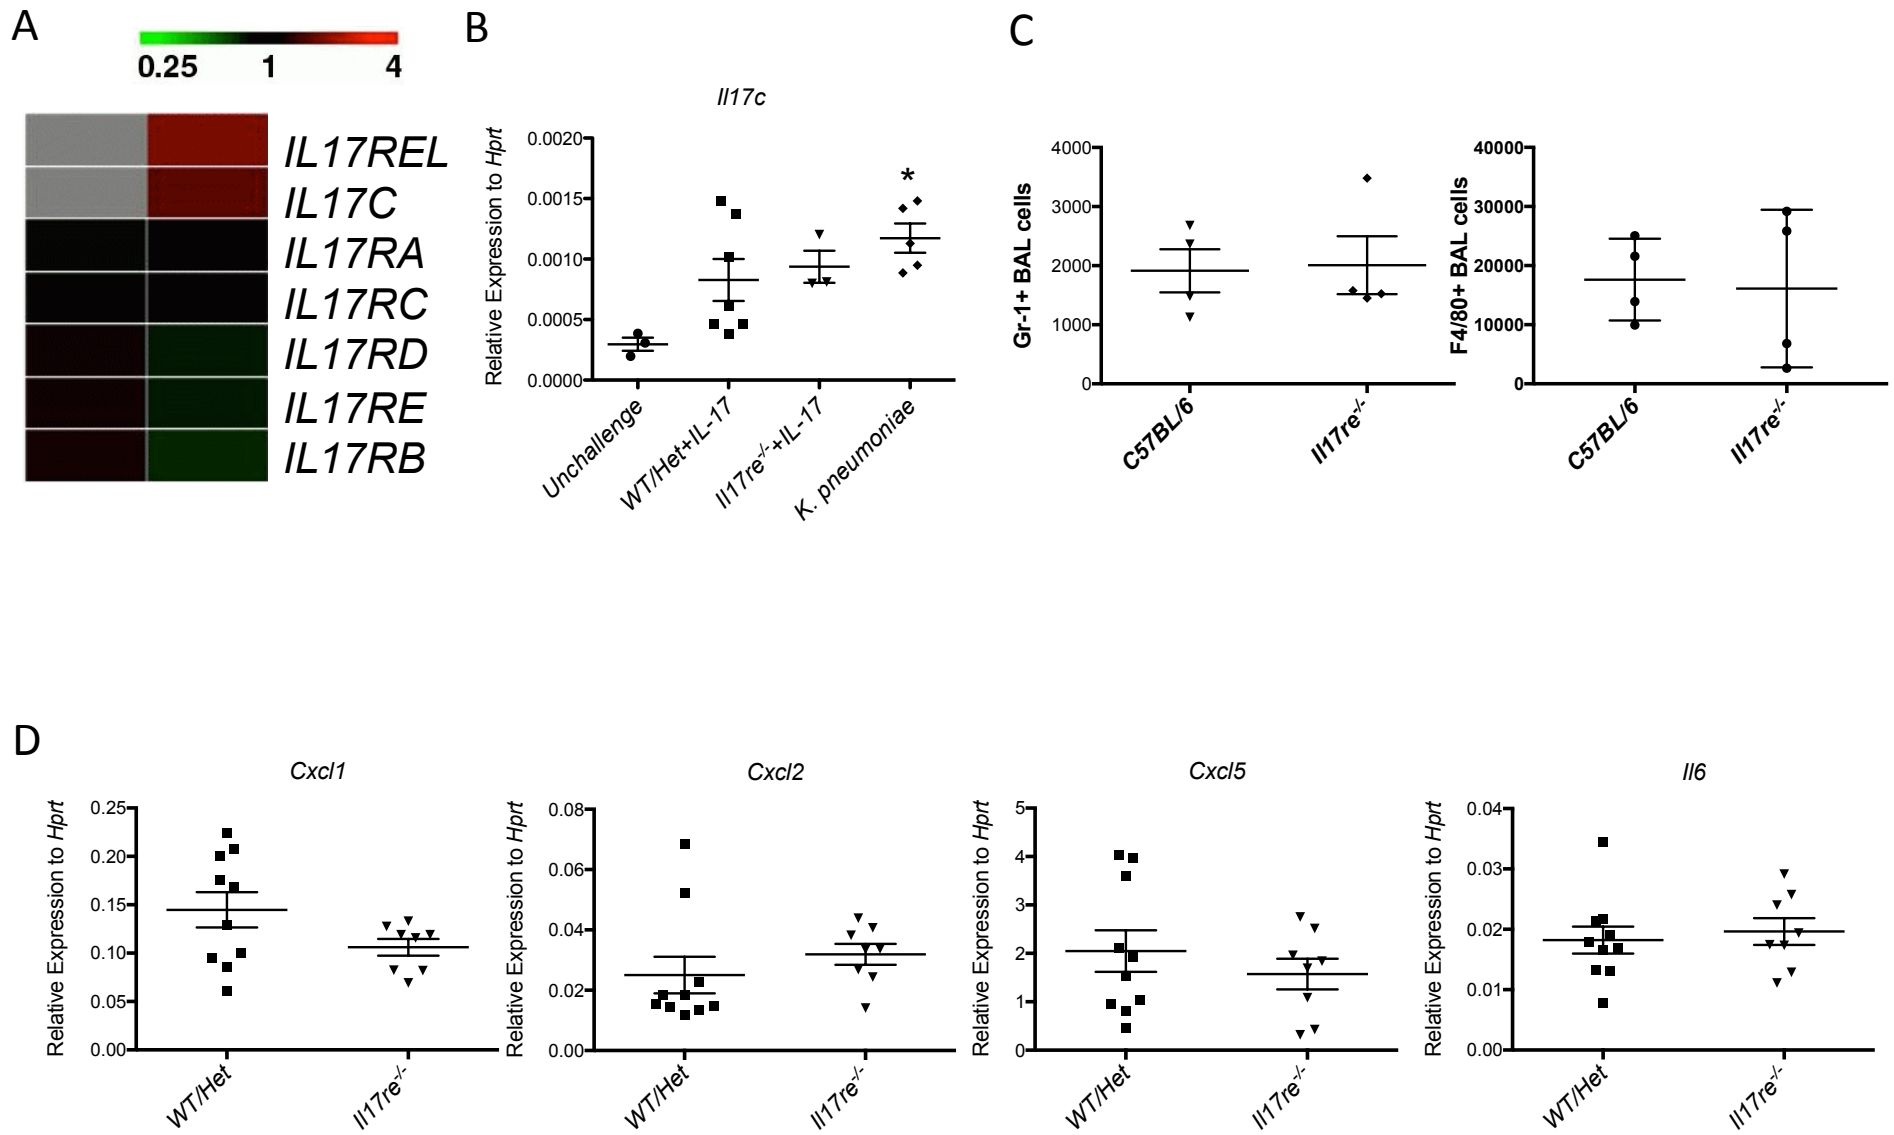

Supplement: NIHMS821724-supplement-Extended_data.pdf [file NIHMS821724-supplement-Extended_data.pdf]
